# Supplementary material for: Potassium modified layered Ln2O2CO3 (Ln: La, Nd, Sm, Eu) materials: efficient and stable heterogeneous catalysts for biofuel production
Source: Royal Society of Chemistry journal article supplement (doi:10.1039/c4gc02429j), 2015-01-01
Supplement: c4gc02429j1.pdf [file c4gc02429j1.pdf]

ARTICLE

Supporting Information

**Potassium modified layered  $\text{Ln}_2\text{O}_2\text{CO}_3$  (Ln: La, Nd, Sm, Eu) materials:  
Efficient and stable heterogeneous catalysts for biofuel production**

Yashan Zhang<sup>a</sup>, Lei Jin<sup>a</sup>, Kevin Sterling<sup>a</sup>, Zhu Luo<sup>b</sup>, Ting Jiang<sup>c</sup>, Ran Miao<sup>a</sup>, Curtis Guild<sup>a</sup>, and Steven L Suib<sup>\*a,b</sup>

<sup>a</sup> *Department of Chemistry. University of Connecticut, Storrs, Connecticut 06269. USA. Fax: +1 860 486 2981; Tel: +1 860 486 2797; E-mail: [steven.suib@uconn.edu](mailto:steven.suib@uconn.edu)*

<sup>b</sup> *Institute of Materials Science. University of Connecticut, Storrs, Connecticut 06269. USA.*

<sup>c</sup> *Chemical & Biomolecular Engineering Department, University of Connecticut, Storrs, Connecticut 06269. USA.*

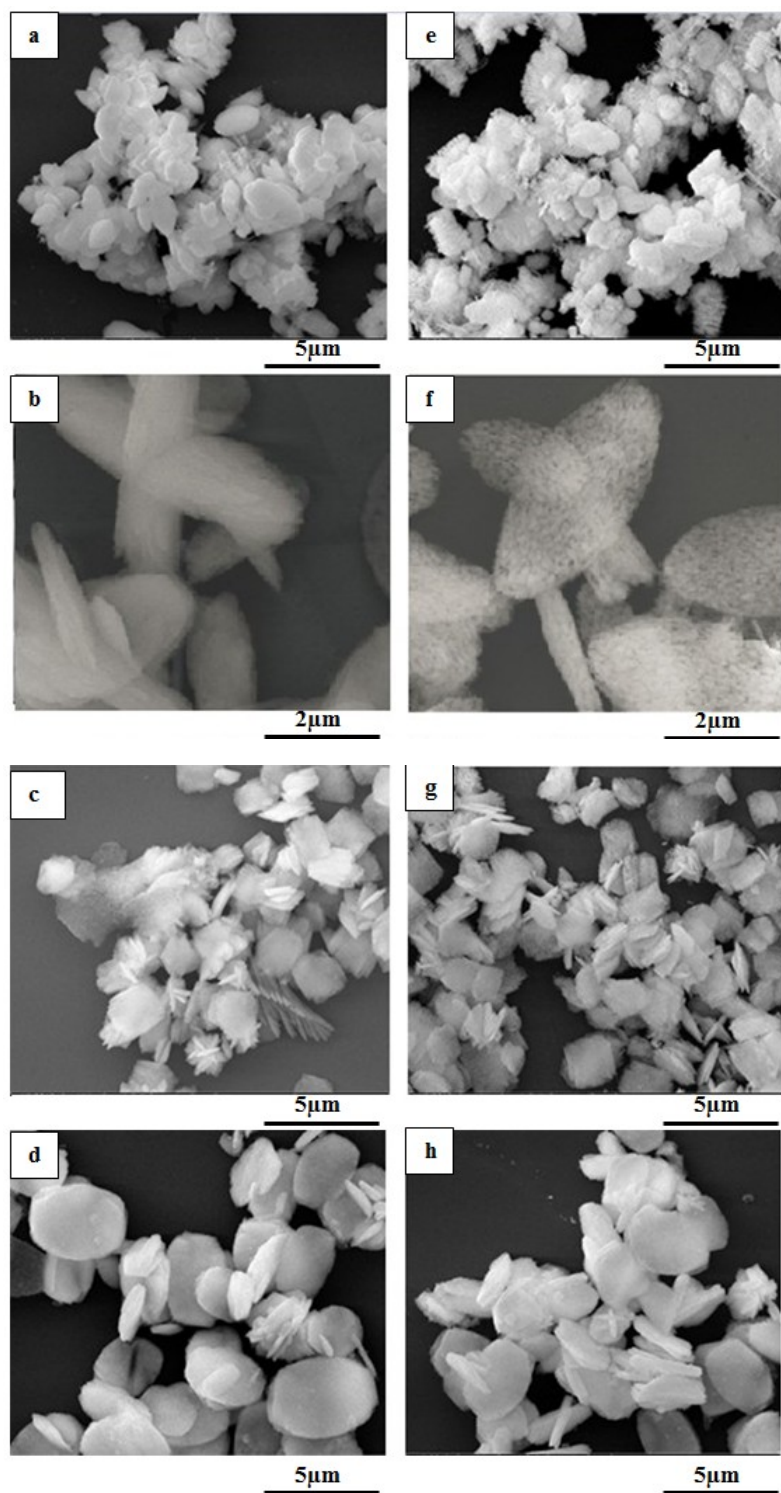

**Fig. S1.** SEM images of  $\text{Ln}_2\text{O}(\text{CO}_3)_2$  (before calcination), Ln: (a) La, (b): Nd, (c) Sm, and (d) Eu, and  $\text{Ln}_2\text{O}_2\text{CO}_3$  (after calcination), Ln : (e) La, (f) Nd, (g) Sm, and (h) Eu.

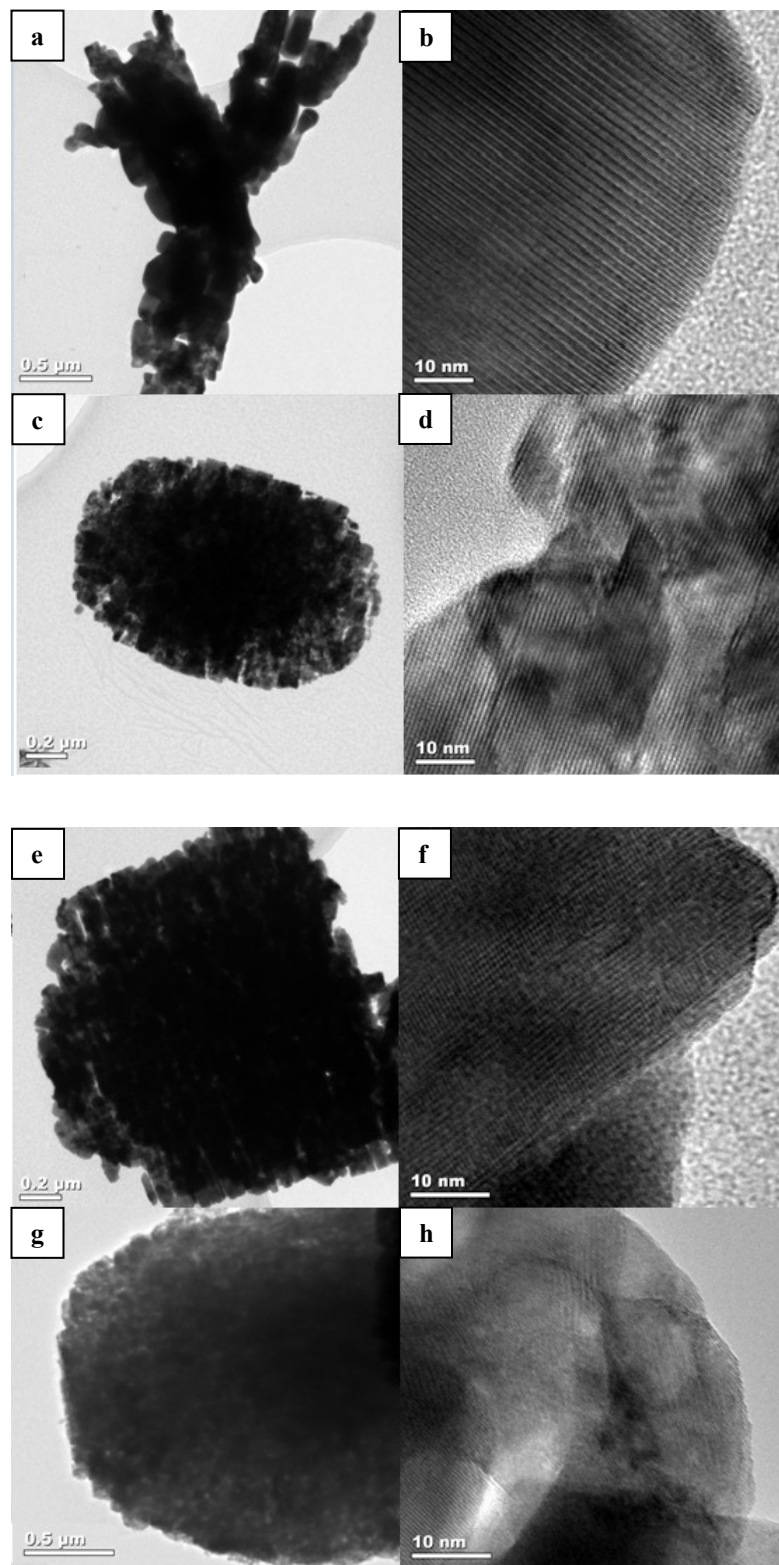

**Fig. S2** TEM images of  $\text{Ln}_2\text{O}_2\text{CO}_3$ , Ln: (a) (b) La, (c) (d) Nd, (e) (f) Sm, and (g) (h) Eu.

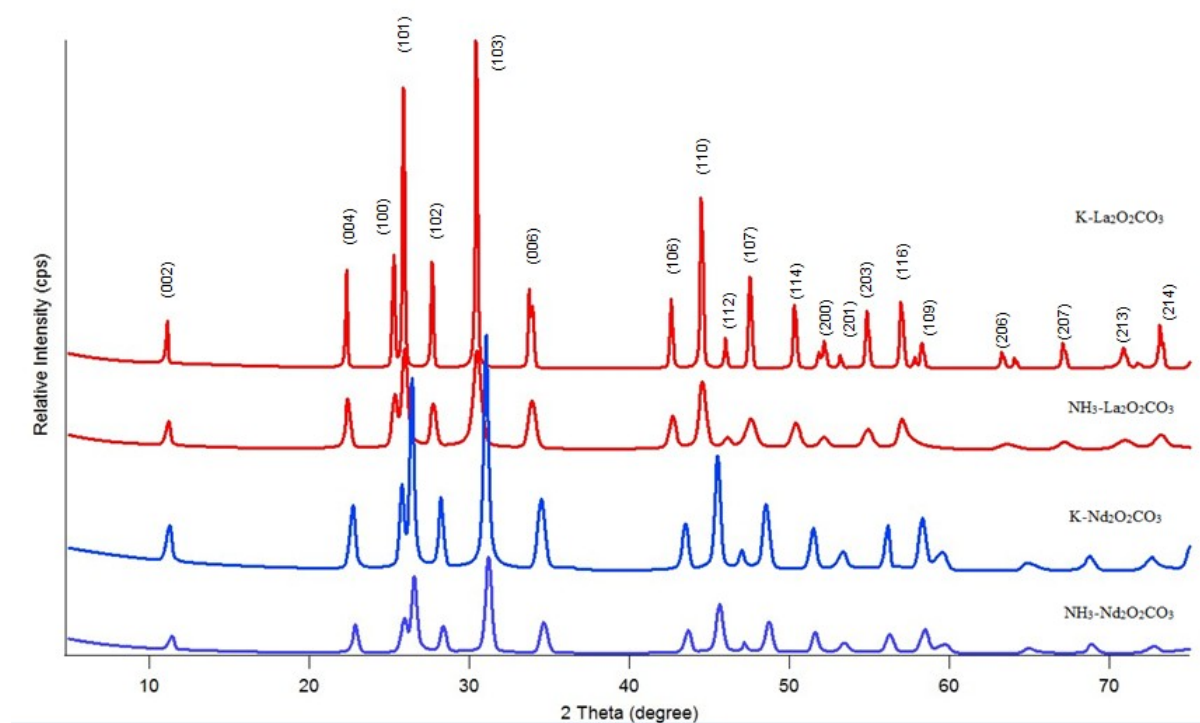

**Fig. S3** XRD patterns of synthesized layered  $\text{Ln}_2\text{O}_2\text{CO}_3$  (Ln: La and Nd) materials by using  $\text{NH}_3$  and  $(\text{NH}_4)_2\text{CO}_3$  (labeled as  $\text{NH}_3\text{-Ln}_2\text{O}_2\text{CO}_3$ ) and  $\text{KOH}$  and  $\text{K}_2\text{CO}_3$  (labeled as  $\text{K-Ln}_2\text{O}_2\text{CO}_3$ ) as basic starting materials.

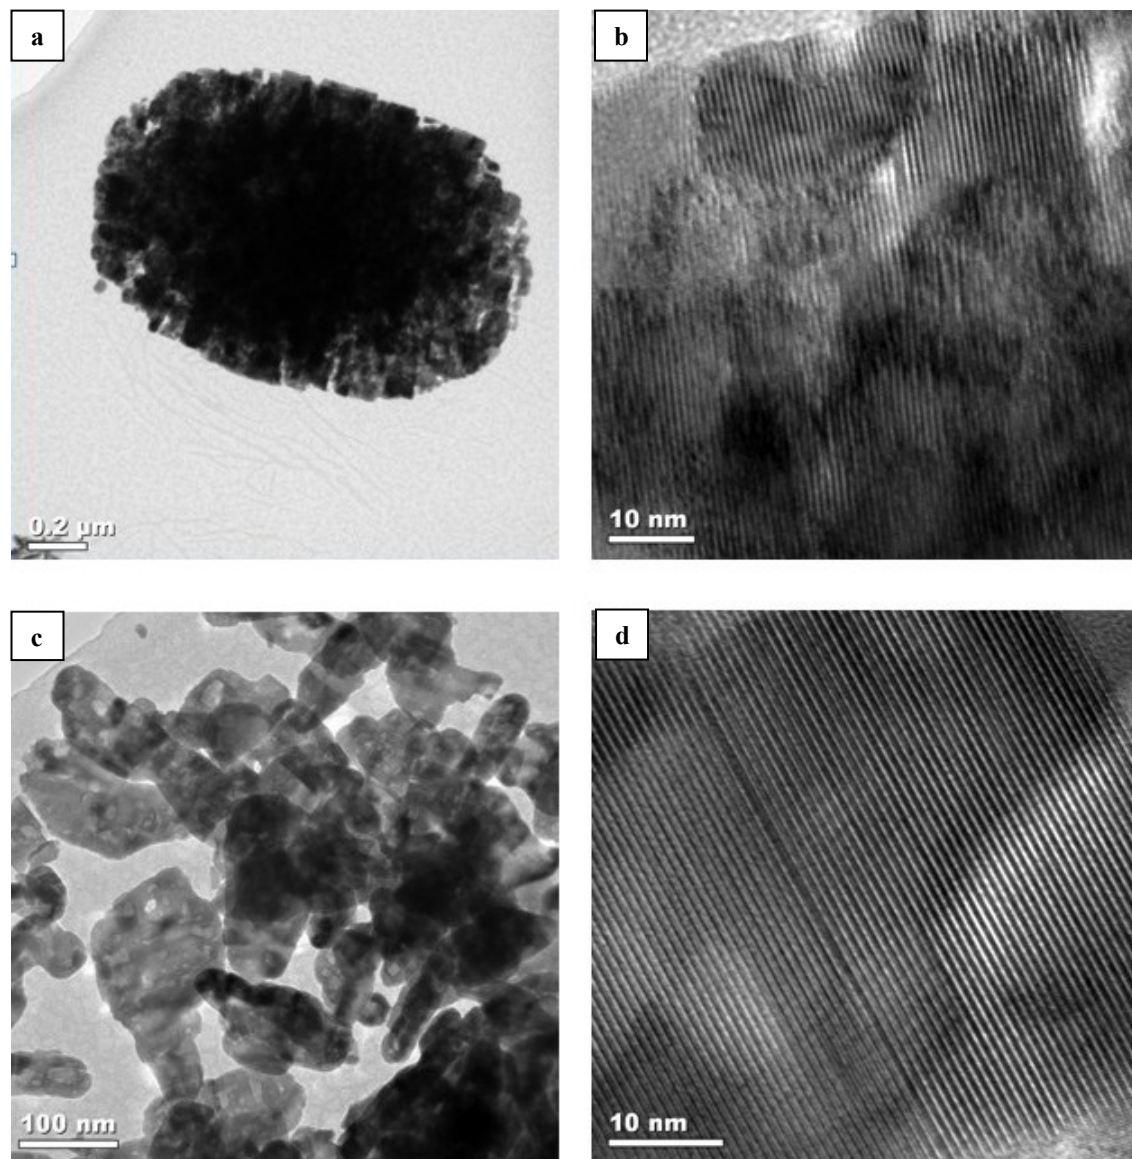

**Fig. S4** TEM pictures of (a), (b) potassium contained base synthesized  $\text{Nd}_2\text{O}_2\text{CO}_3$  material and (c), (d) ammonium contained base synthesized  $\text{Nd}_2\text{O}_2\text{CO}_3$  material.



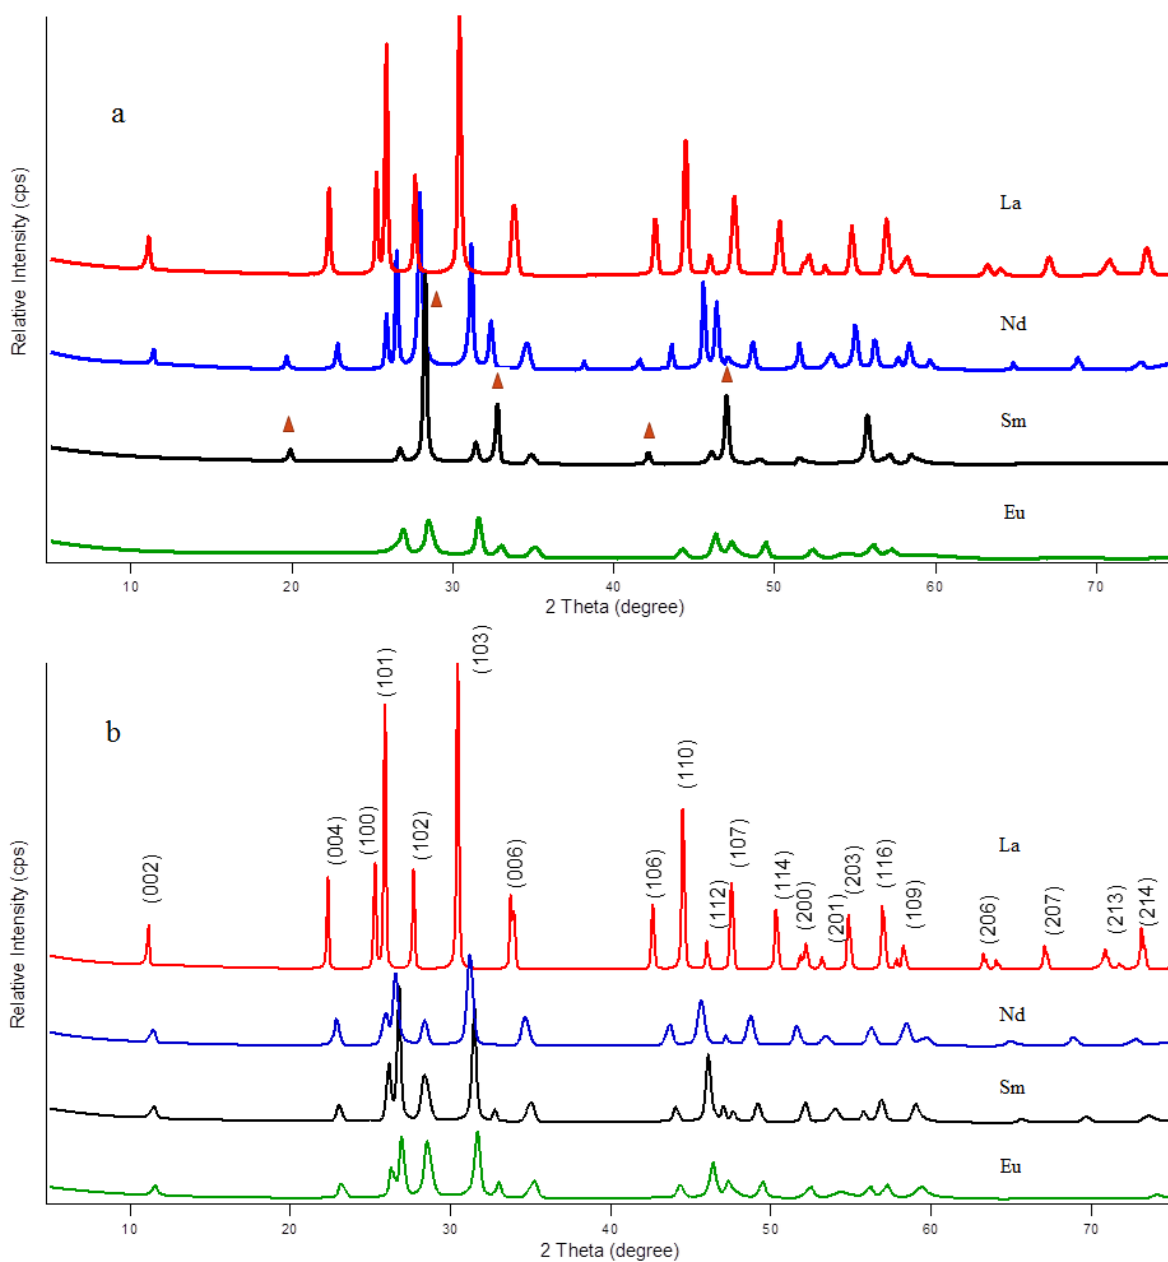

**Fig. S5** XRD patterns of (a) synthesized  $\text{Ln}_2\text{O}(\text{CO}_3)_2$  ( $\text{Ln} = \text{La}, \text{Nd}, \text{Sm}, \text{Eu}$ ) solid materials after 4<sup>th</sup> cycle of biodiesel reactions,  $\blacktriangle$  the peaks from  $\text{Ln}_2\text{O}_3$  (b) synthesized layered rare earth oxycarbonate materials  $\text{Ln}_2\text{O}_2\text{CO}_3$  ( $\text{Ln} = \text{La}, \text{Nd}, \text{Sm}, \text{Eu}$ ) before reactions.

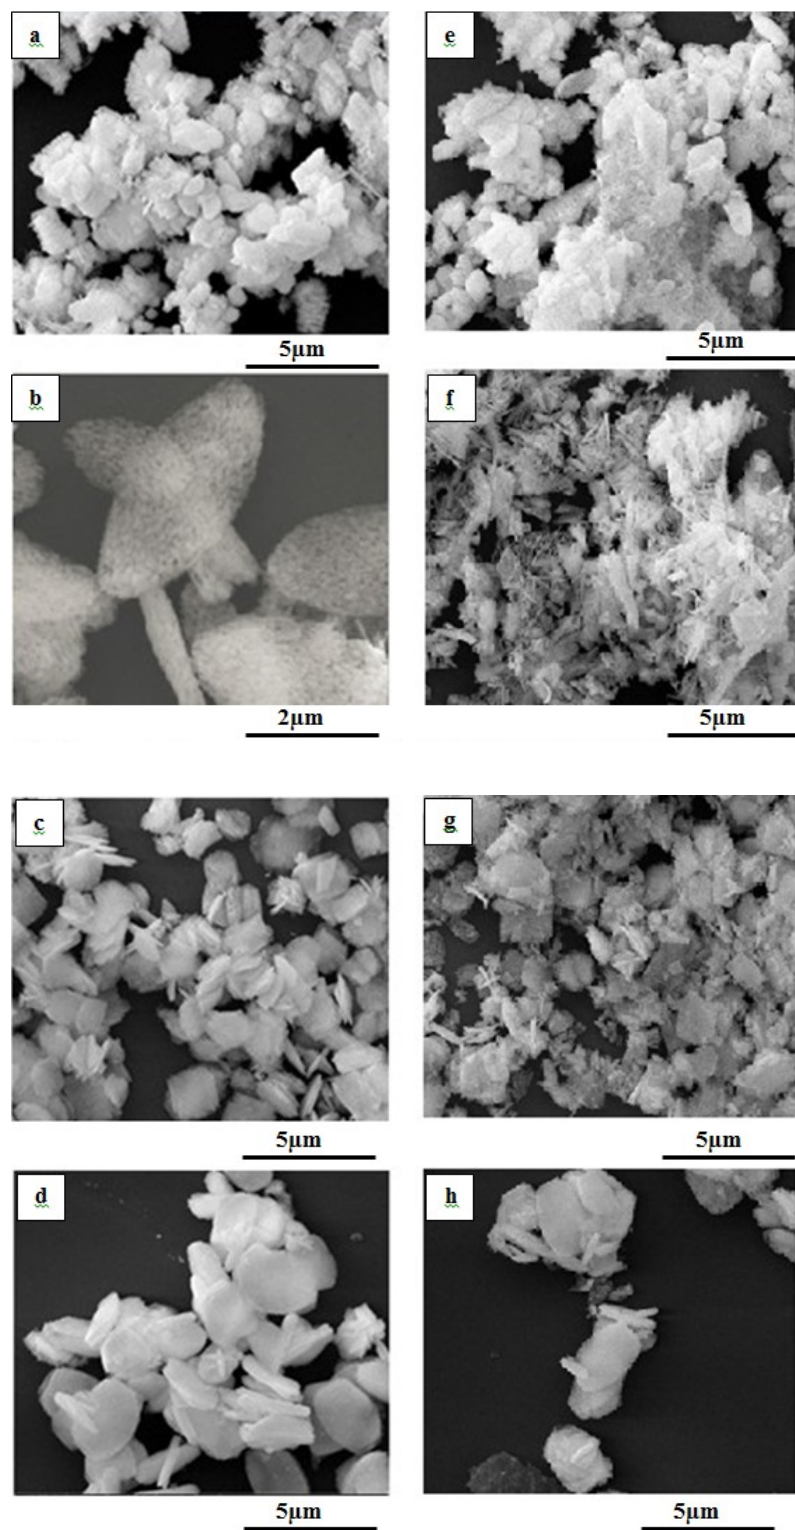

**Fig. S6** SEM images of  $\text{Ln}_2\text{O}_2\text{CO}$  before reactions (a) La, (b): Nd, (c) Sm, and (d) Eu and after reactions, (e) La, (f) Nd, (g) Sm, and (h) Eu.

$$\text{Yield \% of FAME} = \frac{\text{FAME}}{\text{FAME} + \text{MG} + \text{DG} + \text{TG}} \times 100\%$$

**Equation S1** The equation to calculate yield of FAME for biodiesel reactions. (FAME: fatty acid methyl esters; MG: monoglycerides; DG: diglycerides; TG: triglycerides.)



**Table S1.** BET surface area and basic strength tests by indicators and TPD-CO<sub>2</sub>.

| Sample                                         | BET Surface Area<br>(g/m <sup>2</sup> ) | Basic Strength<br>(H <sub>+</sub> ) | Basic Sites Amount<br>(< 200 °C mmol/g) |
|------------------------------------------------|-----------------------------------------|-------------------------------------|-----------------------------------------|
| La <sub>2</sub> O <sub>2</sub> CO <sub>3</sub> | 11                                      | +9.3                                | 0.15                                    |
| Nd <sub>2</sub> O <sub>2</sub> CO <sub>3</sub> | 19                                      | +9.3                                | 0.33                                    |
| Sm <sub>2</sub> O <sub>2</sub> CO <sub>3</sub> | 15                                      | +9.3                                | 0.15                                    |
| Eu <sub>2</sub> O <sub>2</sub> CO <sub>3</sub> | 13                                      | +9.3                                | 0.21                                    |

**Table S2.** Biodiesel yields of potassium and ammonium based  $\text{Ln}_2\text{O}_2\text{CO}_3$  materials.

| Sample                             | Starting Base Mixture                          | FAME Yield |
|------------------------------------|------------------------------------------------|------------|
| $\text{La}_2\text{O}_2\text{CO}_3$ | KOH and $\text{K}_2\text{CO}_3$                | 78 %       |
|                                    | $\text{NH}_3$ and $(\text{NH}_4)_2\text{CO}_3$ | 24 %       |
| $\text{Nd}_2\text{O}_2\text{CO}_3$ | KOH and $\text{K}_2\text{CO}_3$                | 99 %       |
|                                    | $\text{NH}_3$ and $(\text{NH}_4)_2\text{CO}_3$ | 25 %       |

**Table S3.** The potassium amount in fresh and recycled  $\text{Ln}_2\text{O}_2\text{CO}_3$  materials.

| Sample                             | $\text{K}^+$ Amount in $\text{Ln}_2\text{O}_2\text{CO}_3$ Materials (wt. %) | $\text{K}^+$ Amount in Recycled $\text{Ln}_2\text{O}_2\text{CO}_3$ Materials (wt. %) | $\text{K}^+$ Amount in $\text{Ln}_2\text{O}_2\text{CO}_3$ Materials (Mole. %) |
|------------------------------------|-----------------------------------------------------------------------------|--------------------------------------------------------------------------------------|-------------------------------------------------------------------------------|
| $\text{La}_2\text{O}_2\text{CO}_3$ | 1.35                                                                        | 0.77                                                                                 | 11.5                                                                          |
| $\text{Nd}_2\text{O}_2\text{CO}_3$ | 1.45                                                                        | 1.12                                                                                 | 12.5                                                                          |
| $\text{Sm}_2\text{O}_2\text{CO}_3$ | 1.10                                                                        | 0.47                                                                                 | 10.0                                                                          |
| $\text{Eu}_2\text{O}_2\text{CO}_3$ | 1.03                                                                        | 0.42                                                                                 | 9.5                                                                           |

**Table S4.** The potassium and rare earth metal amount in biodiesel.

| Sample                                         | K <sup>+</sup> Amount in Biodiesel Product (ppm) | Ln <sup>3+</sup> Amount in Biodiesel Product (ppm) |
|------------------------------------------------|--------------------------------------------------|----------------------------------------------------|
| La <sub>2</sub> O <sub>2</sub> CO <sub>3</sub> | 1.4                                              | ND                                                 |
| Nd <sub>2</sub> O <sub>2</sub> CO <sub>3</sub> | ND                                               | ND                                                 |
| Sm <sub>2</sub> O <sub>2</sub> CO <sub>3</sub> | 2.5                                              | ND                                                 |
| Eu <sub>2</sub> O <sub>2</sub> CO <sub>3</sub> | 4.5                                              | ND                                                 |

ND: Not Detected
